# Supplementary material for: Derepressing muscleblind expression by miRNA sponges ameliorates myotonic dystrophy-like phenotypes in Drosophila
Source: PubMed Central journal article supplement (PMC5090246; doi:10.1038/srep36230), 2016-11-02
Supplement: srep36230-s1.pdf [file srep36230-s1.pdf]

## Derepressing *muscleblind* expression by miRNA sponges ameliorates myotonic dystrophy-like phenotypes in *Drosophila*.

Estefania Cerro-Herreros<sup>1,2</sup>, Juan M. Fernandez-Costa<sup>1,2</sup>, María Sabater-Arcis<sup>1,2</sup>, Beatriz Llamusi<sup>1,2</sup> and Ruben Artero<sup>1,2\*</sup>

### Supplementary Information

**Fig.S1. Quantification of the expression of the mCherry reporter contained in the SP constructs.** The graph represents the fluorescence intensity of mCherry protein (RFU) normalized to total protein. *miR-277SP*, *miR-304SP* and scramble-SP were the three SPs with the highest expression levels in flies, while *miR-92aSP*, *miR-100SP* and *miR-124SP* showed lower expression of the reporter. Dotted line indicates background levels (control flies expressing no reporter).

**Fig. S2. MblC regulates alternative splicing of *Fhos* e16 and *Serca* e13, and *Cyp6W1* expression.** (a and d) Semiquantitative RT-PCR showing splicing of *Fhos* exon 16 (a) and *Tnt* exon 3-5 splicing (d) in flies with the indicated relevant genotypes. *Rp49* transcripts were detected as endogenous control. (b) Quantification of percentage of inclusion of *Fhos* exon 16. Aberrant e16 inclusion in DM1 flies (*i(CTG)480*), was rescued by MblC expression (*i(CTG)480*, *MblC*). Moreover, silencing of Mbl in skeletal muscle (*IR-mbl*) caused a significant exon 16 inclusion while MblC overexpression in a wild type background (*MblC*) promotes the exclusion of *Fhos* exon 16. In contrast, neither CTG repeats nor MblC had any effect on exon 3-5 *Tnt* splicing (d and e). (c and f) Quantification of *Serca* exon 13 and *Cyp6W1* expression levels by qRT-PCR. CTG expansions (*i(CTG)480*) triggered the exclusion of *Serca* exon 13 whilst MblC promoted exon inclusion (c). Furthermore, *Cyp6W1* expression level was increased in DM1 flies (*i(CTG)480*) while MblC overexpression promoted the reduction of this expression (f). (g) Outline of the intron/exon structure of relevant splicing events for *Fhos*, *Tnt* and *Serca* genes. Arrows denote primers used for semi and quantitative RT-PCR analyses. Red and green lines

indicate alternative splicing events. Expression of all indicated transgenes was targeted to muscle with *Mhc-Gal4*. \* $p < 0.05$ , \*\* $p < 0.01$ , \*\*\* $p < 0.001$  (Student's t-test).

### **mCherry quantification**

*UAS-miR-92aSP*, *UAS-miR-100SP*, *UAS-miR-124SP*, *UAS-miR-277SP*, and *UAS-mir-304SP* were expressed in flies under the control of muscle specific *Mhc-Gal4* driver. These flies contain SP elements, which comprise 20 miRNA binding sites in the 3'-untranslated region of mCherry under the control of 10 tunable Gal4 UAS binding sites. 10 female flies were collected and homogenized in 50 mM Tris-HCl pH 8.0 buffer. 100  $\mu$ L of homogenate were added to a black 96-well plate and fluorescence was measured. mCherry was recorded using an excitation wavelength/bandwidth of 530/20 nm and emission wavelength/bandwidth of 590/40 nm with a Fluoroskam Ascent FL microplate reader (Thermo Scientific). Protein levels in fly lysates were determined with BCA assay (Pierce), using Tecan Infinite 200 PRO (Life Sciences), and were used to normalize red fluorescence levels. Three independent measurements were taken for each genotype.

Fig. S1

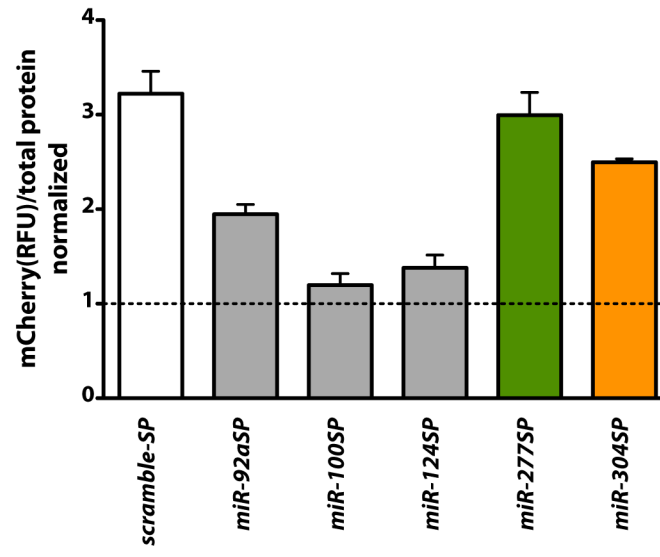

Fig. S2

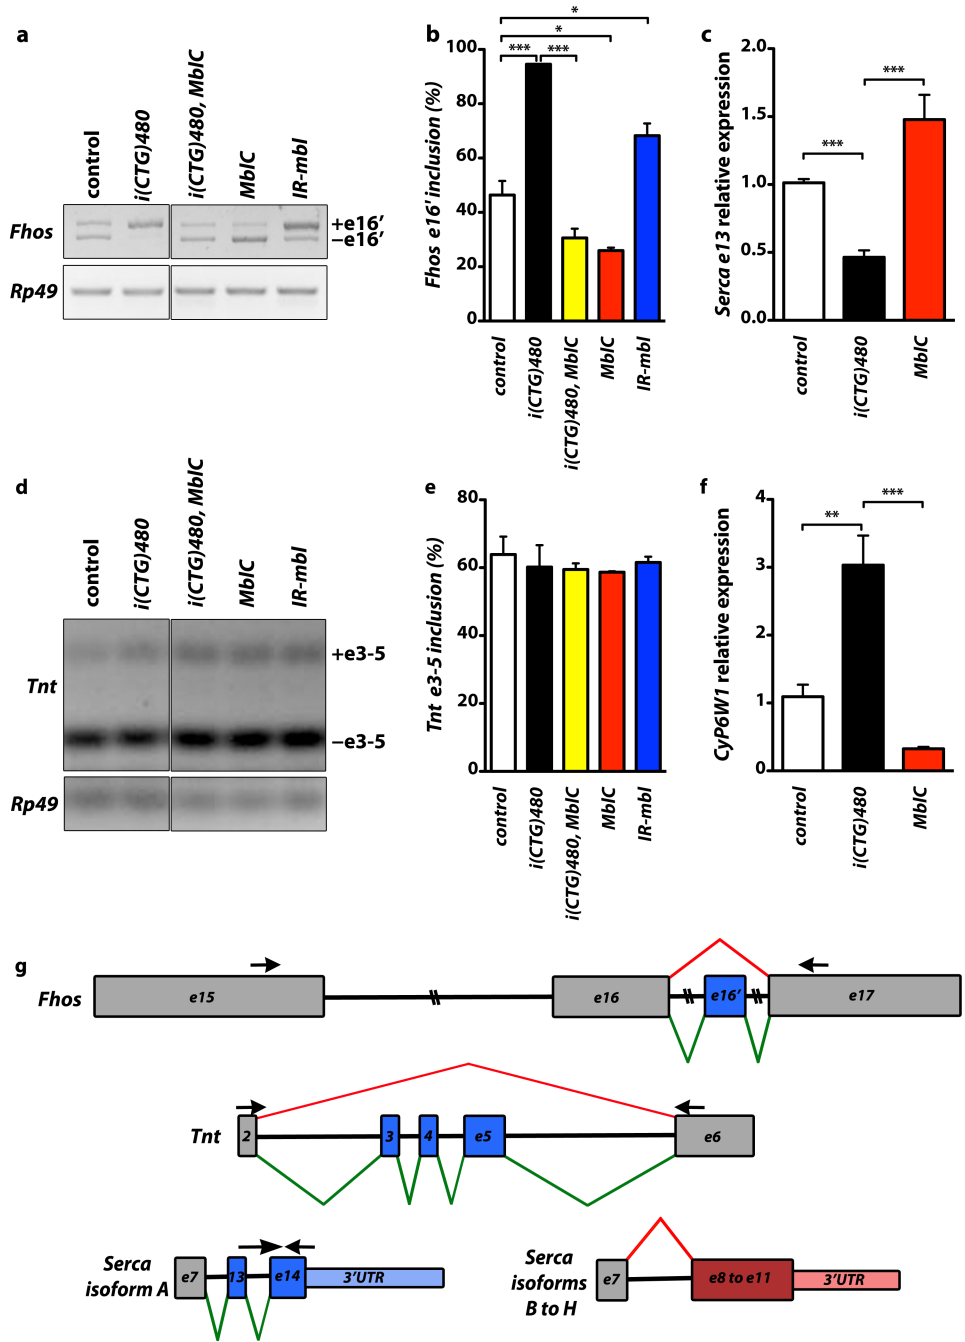

Table S1. qPCR raw data

|                                        | Sample      | Target     | Ct Mean     | Target      | Ct Mean     |
|----------------------------------------|-------------|------------|-------------|-------------|-------------|
| <i>Mhc-Gal4 x UAS-SP</i>               | Scramble-SP | <i>mbl</i> | 28.63888741 | <i>rp49</i> | 28.78798612 |
|                                        | miR-92SP    |            | 25.82085864 |             | 26.70564842 |
|                                        | miR-100SP   |            | 26.09071255 |             | 26.05283455 |
|                                        | miR-124SP   |            | 26.85871792 |             | 27.18436635 |
|                                        | miR-277SP   |            | 24.54497973 |             | 28.51061058 |
|                                        | miR-304SP   |            | 24.04358292 |             | 26.84158007 |
|                                        | Sample      | Target     | Ct Mean     | Target      | Ct Mean     |
| <i>Mhc-Gal4 UAS-i(CTG)480 x UAS-SP</i> | Scramble-SP | <i>mbl</i> | 23.29541016 | <i>rp49</i> | 24.09894867 |
|                                        | miR-277SP   |            | 22.7860775  |             | 27.19969304 |
|                                        | miR-304SP   |            | 23.39365069 |             | 26.32800992 |

|                          | Sample      | Target       | Ct Mean     | Target      | Ct Mean     |
|--------------------------|-------------|--------------|-------------|-------------|-------------|
| <i>Mhc-Gal4 x UAS-SP</i> | Scramble-SP | <i>mbl A</i> | 25.47866313 | <i>rp49</i> | 21.98299281 |
|                          | miR-277SP   |              | 26.24561691 |             | 21.87879372 |
|                          | miR-304SP   |              | 24.40922228 |             | 21.60143153 |
|                          | Scramble-SP | <i>mbl B</i> | 26.17312686 |             | 21.98299281 |
|                          | miR-277SP   |              | 24.52533404 |             | 21.87879372 |
|                          | miR-304SP   |              | 26.66050148 |             | 21.60143153 |
|                          | Scramble-SP | <i>mbl C</i> | 22.54533323 |             | 21.98299281 |
|                          | miR-277SP   |              | 23.40289688 |             | 21.87879372 |
|                          | miR-304SP   |              | 21.3717734  |             | 21.60143153 |
|                          | Scramble-SP | <i>mbl D</i> | 26.88251686 |             | 21.98299281 |
|                          | miR-277SP   |              | 27.72441228 |             | 21.87879372 |
|                          | miR-304SP   |              | 25.43103663 |             | 21.60143153 |

Table S2. Oligonucleotide sequences

| <b>Primer</b>         | <b>Sequence (5' → 3')</b>       | <b>qRT-PCR/RT-PCR</b> |
|-----------------------|---------------------------------|-----------------------|
| <i>mbl fwd</i>        | TTGAATCAAATTATAGCCCAAGCT        | qRT-PCR               |
| <i>mbl rev</i>        | CGATTTTGCTCGTTAGCGTTT           | qRT-PCR               |
| <i>mblA fwd</i>       | CAGACACCGAAATACTCTCTACAAACA     | qRT-PCR               |
| <i>mblA rev</i>       | AAAATCAGGAGTAAACAAATACACGTAGAC  | qRT-PCR               |
| <i>mblB fwd</i>       | CACACATCCAGATATGCTACTTACCA      | qRT-PCR               |
| <i>mblB rev</i>       | TGAGCGATTTTCGATTGATTTTG         | qRT-PCR               |
| <i>mblC fwd</i>       | CAGCAAACACACATCACCTACCA         | qRT-PCR               |
| <i>mblC rev</i>       | CTATCGAGCAGGAGGATGAAGAG         | qRT-PCR               |
| <i>mblD fwd</i>       | GCCTCTGGAAAATGCTGCAA            | qRT-PCR               |
| <i>mblD rev</i>       | CAGCAACCGCAAAGAGCTT             | qRT-PCR               |
| <i>Serca fwd</i>      | GCAGATGTTCTGATGTCG              | qRT-PCR               |
| <i>Serca rev</i>      | CGTCCTCCTTCACATTCAC             | qRT-PCR               |
| <i>Cyp6w1 fwd</i>     | TTGCGCACAAAATCTCTCC             | qRT-PCR               |
| <i>Cyp6w1 rev</i>     | GTCCTGCAAGTTCTTTCCAA            | qRT-PCR               |
| <i>Rp49 fwd</i>       | GGATCGATATGCTAAGCTGTCGCACA      | qRT-PCR/ RT-PCR       |
| <i>Rp49 rev</i>       | GGTGCGCTTGTTTCGATCCGTAACC       | qRT-PCR/ RT-PCR       |
| <i>Fhos fwd</i>       | GTCATGGAGTCGAGCAGTGA            | RT-PCR                |
| <i>Fhos rev</i>       | TGTGATGCGGGTATCTACGA            | RT-PCR                |
| <i>Tnt fwd</i>        | CGACGATGAAGAGTACAC              | RT-PCR                |
| <i>Tnt rev</i>        | ACTCGGTGATGTATTCTTTTCAG         | RT-PCR                |
| <i>mblA 3'UTR fwd</i> | CAGCGATCGCCGCGATTTTATTTACGCTTAC | PCR                   |
| <i>mblA 3'UTR rev</i> | CACTCGAGGTTTAGTGGTTAGAGCCGA     | PCR                   |

|                       |                                 |     |
|-----------------------|---------------------------------|-----|
| <i>mbIB 3'UTR fwd</i> | CCGCGATCGCTTTGTTATCCTCATTCCCTTG | PCR |
| <i>mbIB 3'UTR rev</i> | CGCGCTCGAGGATCGGTTTTATAATTTTG   | PCR |
| <i>mbIC 3'UTR fwd</i> | GGCTCGAGACCAGAGACGTATATTA       | PCR |
| <i>mbIC 3'UTR rev</i> | AGCGATCGCTAAGTTGTTATTAATAC      | PCR |
| <i>mbID 3'UTR fwd</i> | GCGATCGCCTAATTAATTATGCAGTA      | PCR |
| <i>mbID 3'UTR rev</i> | CTCGAGTCGACTTCAATTCGAAT         | PCR |
